# Supplementary material
Source: publisher figshare collection journal article supplement (https://acs.figshare.com/ndownloader/files/3786322)
Supplement: Supplementary file 1 [file 3786322]

## Supplementary Information

### A Steric Effect on the Nucleophilic Reactivity of Nickel(III)-Peroxo Complexes

Jalee Kim,<sup>1,‡</sup> Bongki Shin,<sup>1,‡</sup> Hyunjeong Kim,<sup>1</sup> Junhyung Lee,<sup>1</sup> Joongoo Kang,<sup>1</sup> Sachiko Yanagisawa,<sup>2</sup>  
Takashi Ogura,<sup>2</sup> Hideki Masuda,<sup>3</sup> Tomohiro Ozawa,<sup>3</sup> and Jaeheung Cho<sup>\*1</sup>

<sup>1</sup>*Department of Emerging Materials Science, DGIST, Daegu 711-873, Korea*

<sup>2</sup>*Department of Frontier Materials, Graduate School of Engineering, Nagoya Institute of Technology,  
Gokiso, Showa, Nagoya 466-8555, Japan*

<sup>3</sup>*Picobiology Institute, Graduate School of Life Science, University of Hyogo, Koto 3-2-1, Kamigori-cho,  
Ako-gun, Hyogo 678-1297, Japan*

<sup>‡</sup>These authors contributed equally.

<sup>\*</sup>To whom correspondence should be addressed.

E-mail: jaeheung@dgist.ac.kr

## Experimental Section

### Synthesis of Ligands

**Pyridine-2,6-dicarbaldehyde (L1).** We have modified the published method by using SeO<sub>2</sub> and 1,4-dioxane to obtain **L1**.<sup>[1]</sup> Yield: 5.12 g (71%), <sup>1</sup>H NMR (CDCl<sub>3</sub>, 400 MHz): 8.07 (1H, t, PyH), 8.16 (2H, d, PyH), 10.15 (2H, s, CH).

**N,N'-(pyridine-2,6-diylbis(methylene))dicyclohexylamine (L2).** To a stirred ethanol solution of **L1** (13 g, 10 mmol) was added cyclohexylamine (2.86 mL, 25 mmol) over 1 hour. Upon stirring for 6 hours, excess NaBH<sub>4</sub> was added to the mixture, which was further stirred for several hours. The solution was filtered and evaporated under reduced pressure. An ordinary work-up treatment of the reaction mixture with NaOH followed by extraction with CHCl<sub>3</sub> and evaporation gave an organic product. Yield: 2.38 g (88%), <sup>1</sup>H NMR (CDCl<sub>3</sub>, 400 MHz): ~1.08 (12H, m, CH<sub>2</sub>), ~1.70 (8H, m, CH<sub>2</sub>), 2.40 (2H, s, CH), 3.82 (4H, s, CH<sub>2</sub>), 7.05 (2H, d, PyH), 7.48 (1H, t, PyH).

**2,6-bis(chloromethyl)pyridine (L3).** To a stirred Et<sub>2</sub>O solution of 2,6-bis(hydroxymethyl)pyridine (6.33 g) in an ice bath was slowly added thionyl chloride (7.29 mL). The mixture was then warmed on the water bath for 20 hours, during which time a white precipitate formed. The precipitate was collected by filtration. The solid was dissolved in water treated with NaHCO<sub>3</sub>. The mixture was extracted with ethyl acetate. The solvent was removed under reduced pressure to yield **L3**, as a white solid. Yield: 8.82 g (91 %), <sup>1</sup>H NMR (CDCl<sub>3</sub>, 400 MHz): 4.66 (4H, s, CH<sub>2</sub>), 7.45 (2H, t, CH), 7.76 (1H, t, PyH).

**N,N'-di-cyclohexyl-2,11-diaza[3,3](2,6)pyridinophane (CHDAP).** **L2** (0.498 g, 2 mmol) in DMF and sodium carbonate (0.15 g) were heated at reflux. A DMF solution of **L3** (0.603 g, 3.4 mmol) was then added dropwise to the mixture over 1 hour while stirring. After adding an ice water, a white powder precipitated and was filtered and washed with water and ethanol. Yield: 0.58 g (72%), <sup>1</sup>H NMR (CDCl<sub>3</sub>, 400 MHz):  $\delta$  ~1.14 (2H, m, CH<sub>2</sub>), ~1.39 (8H, m, CH<sub>2</sub>), 1.68 (2H, d, CH<sub>2</sub>), 1.87 (4H, d, CH<sub>2</sub>), 2.03 (4H, d, CH<sub>2</sub>), 2.76 (2H, m, CH), 3.92 (8H, s, CH<sub>2</sub>), 6.72 (4H, d, PyH), 7.05 (2H, t, PyH). <sup>13</sup>C NMR (CDCl<sub>3</sub>, 400 MHz):  $\delta$  159.2, 135.5, 122.5, 67.9, 60.9, 30.2, 26.6. CSI-TOF-MS (in CH<sub>3</sub>CN):  $m/z$  405.3008 [M + H]<sup>+</sup>.

### Preparation of Precursor Complexes

**[Ni(TBDAP)(NO<sub>3</sub>)(H<sub>2</sub>O)](NO<sub>3</sub>).** To an acetonitrile solution (2 mL) of Ni(NO<sub>3</sub>)<sub>2</sub>·6H<sub>2</sub>O (0.29 g, 1 mmol), a chloroform solution (2 mL) of TBDAP (0.35 g, 1 mmol) was added slowly. The mixture was stirred for overnight. The solvents were removed under vacuum to yield blue powder, which was recrystallized from CH<sub>3</sub>CN/Et<sub>2</sub>O solution as a blue product. Yield: 0.4 g (75%). Paramagnetic <sup>1</sup>H NMR spectrum in SI, Figure S10. UV-vis (CH<sub>3</sub>CN):  $\lambda_{\text{max}}$  ( $\epsilon$ ) = 645 nm (10 M<sup>-1</sup> cm<sup>-1</sup>), 823 nm (10 M<sup>-1</sup> cm<sup>-1</sup>), and 1066 nm (25 M<sup>-1</sup> cm<sup>-1</sup>). ESI-MS (CH<sub>3</sub>CN):  $m/z$  472.2 for [Ni(TBDAP)(NO<sub>3</sub>)]<sup>+</sup>. Anal. Calcd for C<sub>22</sub>H<sub>34</sub>N<sub>6</sub>NiO<sub>7</sub>: C, 47.76; H, 6.19; N, 15.19. Found: C, 47.85; H, 5.79; N, 15.33.  $\mu_{\text{eff}}$  = 2.9 BM. X-ray quality crystals were obtained by slow diffusion of Et<sub>2</sub>O into a solution of the complex in CH<sub>3</sub>CN.

**[Ni(CHDAP)(NO<sub>3</sub>)](NO<sub>3</sub>)(CH<sub>3</sub>OH).** CHDAP (0.18 g, 0.5 mmol) in chloroform (2 mL) was added to CH<sub>3</sub>CN solution (2 mL) of Ni(NO<sub>3</sub>)<sub>2</sub>·6H<sub>2</sub>O (0.15 g, 0.5 mmol). The resulting solution was stirred for 12 hours, affording a blue solution. The solvents were removed under vacuum to yield blue powder, which was recrystallized from MeOH/Et<sub>2</sub>O solution as a blue crystalline product. Crystalline yield: 0.18 g (75%). Paramagnetic <sup>1</sup>H NMR spectrum in SI, Figure S10. UV-vis (CH<sub>3</sub>CN): λ<sub>max</sub> (ε) = 588 nm (15 M<sup>-1</sup> cm<sup>-1</sup>), 835 nm (25 M<sup>-1</sup> cm<sup>-1</sup>), and 1010 nm (45 M<sup>-1</sup> cm<sup>-1</sup>). ESI-MS (CH<sub>3</sub>CN): *m/z* 251.7 for [Ni(CHDAP)(CH<sub>3</sub>CN)]<sup>2+</sup>, and 524.3 for [Ni(CHDAP)(NO<sub>3</sub>)]<sup>+</sup>. Anal. Calcd for C<sub>27</sub>H<sub>40</sub>N<sub>6</sub>O<sub>7</sub>Ni: C, 52.36; H, 6.51; N, 13.57. Found: C, 52.28; H, 6.30; N, 13.75. μ<sub>eff</sub> = 3.1 BM.

**[Ni(CHDAP)Cl<sub>2</sub>].** CHDAP (0.15 g, 0.37 mmol) in dichloromethane (10 mL) was added to suspension of NiCl<sub>2</sub> (0.05 g, 0.37 mmol) in CH<sub>3</sub>CN (10 mL). The resulting solution was refluxed for 2 days, giving a green solution. The solvents were removed under vacuum to yield solid, which was redissolved in CH<sub>3</sub>CN (4 mL). Et<sub>2</sub>O and pentane were added to the solution to give a green powder. The green powder was collected by filtration, washed with Et<sub>2</sub>O, and dried under vacuum. Yield: 0.17 g (86%). UV-vis (CH<sub>3</sub>CN): λ<sub>max</sub> (ε) = 619 nm (60 M<sup>-1</sup> cm<sup>-1</sup>), 659 nm (50 M<sup>-1</sup> cm<sup>-1</sup>), and 696 nm (50 M<sup>-1</sup> cm<sup>-1</sup>). ESI-MS (CH<sub>3</sub>CN): *m/z* 497.2 for [Ni(CHDAP)Cl]<sup>+</sup>. μ<sub>eff</sub> = 3.4 BM.

## Reference

- [1] Koz, G.; Özdemir, N.; Astley, D.; Dincer, M.; Astley, S. T. *J. Mol. Struct.* **2010**, 966, 39-47.

**Table S1.** Selected bond distances (Å) and angles (°) for [Ni(TBDAP)(NO<sub>3</sub>)(H<sub>2</sub>O)](NO<sub>3</sub>), [Ni(CHDAP)(NO<sub>3</sub>)](NO<sub>3</sub>)(CH<sub>3</sub>OH) and 1-ClO<sub>4</sub>·0.5CH<sub>2</sub>Cl<sub>2</sub>.

| Bond Distances (Å)                                                |            |                                                                     |           |                                                        |            |
|-------------------------------------------------------------------|------------|---------------------------------------------------------------------|-----------|--------------------------------------------------------|------------|
| [Ni(TBDAP)(NO <sub>3</sub> )(H <sub>2</sub> O)](NO <sub>3</sub> ) |            | [Ni(CHDAP)(NO <sub>3</sub> )](NO <sub>3</sub> )(CH <sub>3</sub> OH) |           | 1-ClO <sub>4</sub> ·0.5CH <sub>2</sub> Cl <sub>2</sub> |            |
| Ni1-N1                                                            | 2.291(2)   | Ni1-N1                                                              | 1.9512(9) | Ni1-N1                                                 | 1.9195(15) |
| Ni1-N2                                                            | 1.977(2)   | Ni1-N2                                                              | 2.1889(9) | Ni1-N2                                                 | 2.2453(16) |
| Ni1-N3                                                            | 2.277(2)   | Ni1-N3                                                              | 1.9429(9) | Ni1-N3                                                 | 1.9193(15) |
| Ni1-N4                                                            | 1.985(2)   | Ni1-N4                                                              | 2.2058(9) | Ni1-N4                                                 | 2.2901(15) |
| Ni1-O1                                                            | 2.0940(17) | Ni1-O1                                                              | 2.1352(8) | Ni1-O1                                                 | 1.8589(14) |
| Ni1-O4                                                            | 2.0390(18) | Ni1-O2                                                              | 2.0951(8) | Ni1-O2                                                 | 1.8670(14) |
|                                                                   |            |                                                                     |           | O1-O2                                                  | 1.401(2)   |
| Bond Angles (°)                                                   |            |                                                                     |           |                                                        |            |
| [Ni(TBDAP)(NO <sub>3</sub> )(H <sub>2</sub> O)](NO <sub>3</sub> ) |            | [Ni(CHDAP)(NO <sub>3</sub> )](NO <sub>3</sub> )(CH <sub>3</sub> OH) |           | 1-ClO <sub>4</sub> ·0.5CH <sub>2</sub> Cl <sub>2</sub> |            |
| N1- Ni1-N2                                                        | 81.30(8)   | N1- Ni1-N2                                                          | 82.32(4)  | N1-Ni1-N2                                              | 79.85(6)   |
| N1-Ni1-N3                                                         | 149.30(8)  | N1-Ni1-N3                                                           | 95.64(4)  | N1-Ni1-N3                                              | 93.82(6)   |
| N1-Ni1-N4                                                         | 77.45(8)   | N1-Ni1-N4                                                           | 79.40(4)  | N1-Ni1-N4                                              | 81.99(6)   |
| N2-Ni1-N3                                                         | 77.73(8)   | N2-Ni1-N3                                                           | 80.42(4)  | N2-Ni1-N3                                              | 82.96(6)   |
| N2-Ni1-N4                                                         | 90.51(9)   | N2-Ni1-N4                                                           | 153.22(4) | N2-Ni1-N4                                              | 153.17(6)  |
| N3-Ni1-N4                                                         | 80.55(8)   | N3-Ni1-N4                                                           | 82.08(4)  | N3-Ni1-N4                                              | 78.71(6)   |
|                                                                   |            |                                                                     |           | O1-Ni1-O2                                              | 44.19(7)   |
|                                                                   |            |                                                                     |           | Ni1-O1-O2                                              | 68.21(8)   |
|                                                                   |            |                                                                     |           | Ni1-O2-O1                                              | 67.60(8)   |

**Table S2.** Structural comparison for the nickel(III)-peroxo complexes (Å) in [Ni(TBDAP)(O<sub>2</sub>)]<sup>+</sup> (**1**) and [Ni(CHDAP)(O<sub>2</sub>)]<sup>+</sup> (**2**).

|                                 | X-ray                                     | DFT                                       |                                           |
|---------------------------------|-------------------------------------------|-------------------------------------------|-------------------------------------------|
|                                 | [Ni(TBDAP)(O <sub>2</sub> )] <sup>+</sup> | [Ni(TBDAP)(O <sub>2</sub> )] <sup>+</sup> | [Ni(CHDAP)(O <sub>2</sub> )] <sup>+</sup> |
| avg. Ni-O                       | 1.8630                                    | 1.86                                      | 1.87                                      |
| avg. Ni-N <sub>equatorial</sub> | 1.9194                                    | 1.93                                      | 1.93                                      |
| avg. Ni-N <sub>axial</sub>      | 2.2677                                    | 2.30                                      | 2.23                                      |
| O-O                             | 1.401                                     | 1.36                                      | 1.36                                      |

**Table S3.** Kinetic data for the oxidation of *para*-substituted benzaldehydes by **1** and **2**.

| Substrate            | <b>1</b>                            | <b>2</b>                            |
|----------------------|-------------------------------------|-------------------------------------|
|                      | $k_{\text{obs}}$ (s <sup>-1</sup> ) | $k_{\text{obs}}$ (s <sup>-1</sup> ) |
| p-tolualdehyde       | $3.5 \times 10^{-4}$                | $1.4 \times 10^{-3}$                |
| 4-fluorobenzaldehyde | $8.4 \times 10^{-4}$                | $4.1 \times 10^{-3}$                |
| Benzaldehyde         | $1.3 \times 10^{-3}$                | $6.1 \times 10^{-3}$                |
| 4-chlorobenzaldehyde | $2.2 \times 10^{-3}$                | $8.9 \times 10^{-3}$                |
| 4-bromobenzaldehyde  | $2.5 \times 10^{-3}$                | $9.9 \times 10^{-3}$                |

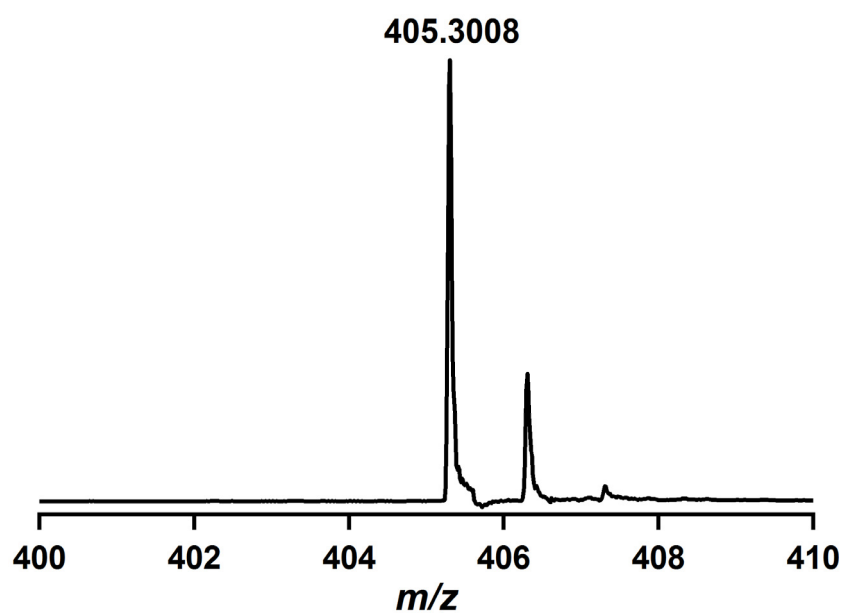

**Figure S1.** CSI-TOF-MS for the CHDAP ligand in  $\text{CH}_3\text{CN}$ .

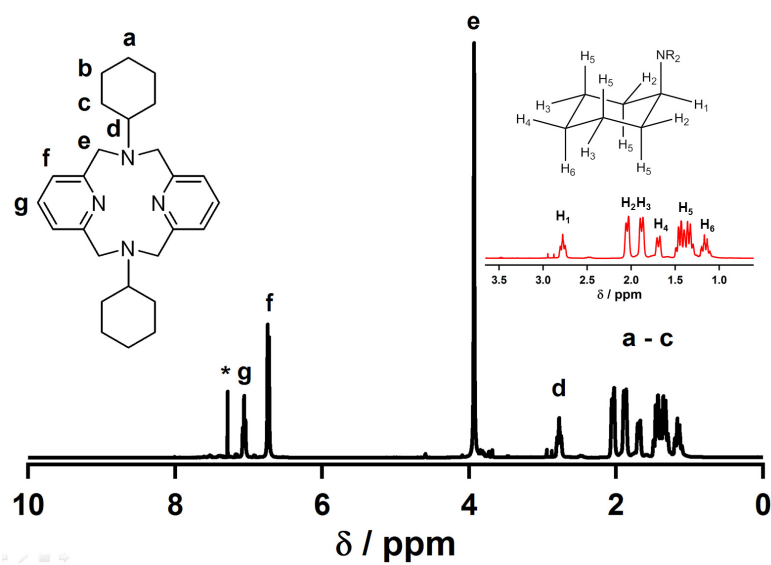

**Figure S2.**  $^1\text{H}$  NMR spectrum of the CHDAP ligand in  $\text{CDCl}_3$  at room temperature. The asterisk is a solvent band. Inset shows the assignments for the signals of the cyclohexyl groups.

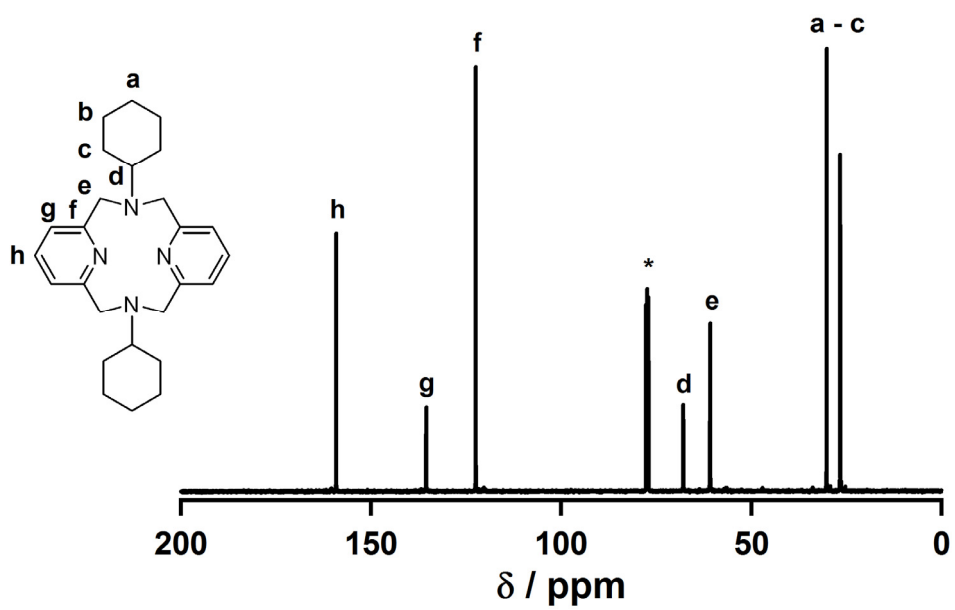

**Figure S3.**  $^{13}\text{C}$  NMR spectrum of the CHDAP ligand in  $\text{CDCl}_3$  at room temperature. The asterisk is a solvent band.



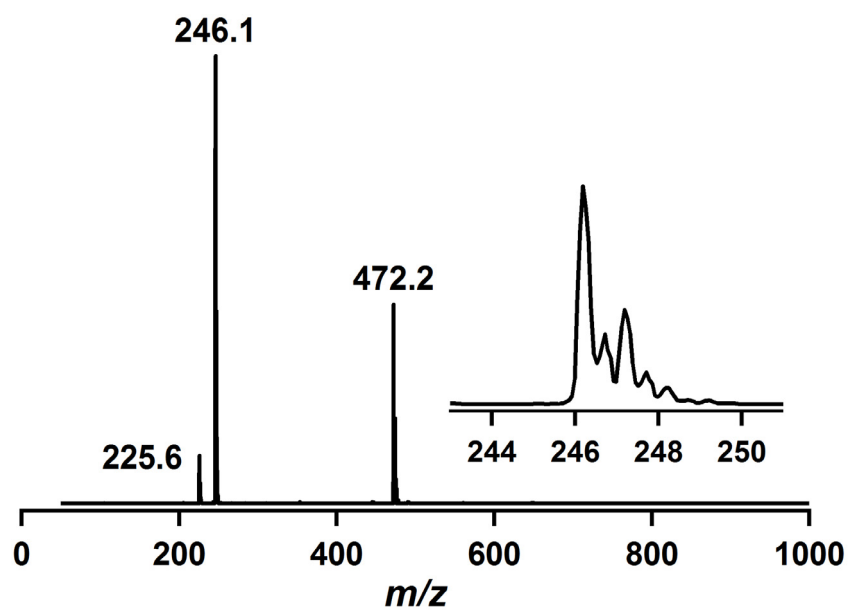

**Figure S4.** ESI-MS for  $[\text{Ni}(\text{TBDAP})(\text{NO}_3)]^+$  in  $\text{CH}_3\text{CN}$ . Mass peaks at 225.6, 246.1 and 472.2 are assigned to  $[\text{Ni}(\text{TBDAP})(\text{CH}_3\text{CN})]^{2+}$ ,  $[\text{Ni}(\text{TBDAP})(\text{CH}_3\text{CN})_2]^{2+}$  and  $[\text{Ni}(\text{TBDAP})(\text{NO}_3)]^+$ , respectively.

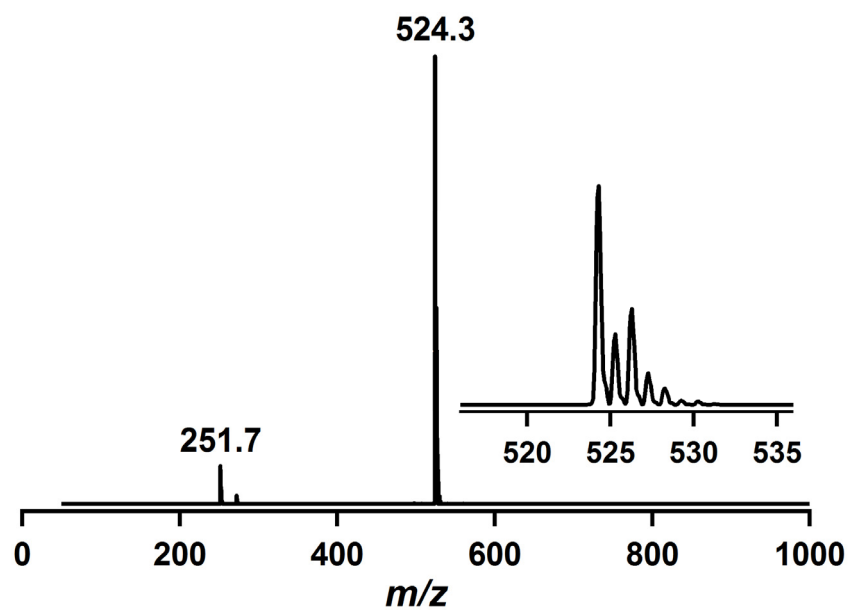

**Figure S5.** ESI-MS for  $[\text{Ni}(\text{CHDAP})(\text{NO}_3)]^+$  in  $\text{CH}_3\text{CN}$ . Mass peaks at 251.7 and 524.3 are assigned to  $[\text{Ni}(\text{CHDAP})(\text{CH}_3\text{CN})]^{2+}$  and  $[\text{Ni}(\text{CHDAP})(\text{NO}_3)]^+$ , respectively.

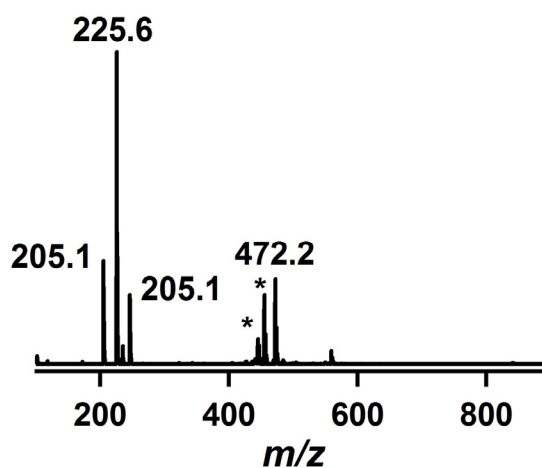

**Figure S6.** ESI-MS taken after the completion of the reaction of **1** with 2-PPA in CH<sub>3</sub>CN at 25 °C, showing the formation of a Ni(II) precursor together with some unidentified species (\*): Mass peaks at *m/z* of 205.1, 225.6, 205.1 and 472.2 are assigned to [Ni(TBDAP)]<sup>2+</sup>, [Ni(TBDAP)(CH<sub>3</sub>CN)]<sup>2+</sup>, [Ni(TBDAP)(CH<sub>3</sub>CN)<sub>2</sub>]<sup>2+</sup> and [Ni(TBDAP)(NO<sub>3</sub>)]<sup>+</sup>, respectively.

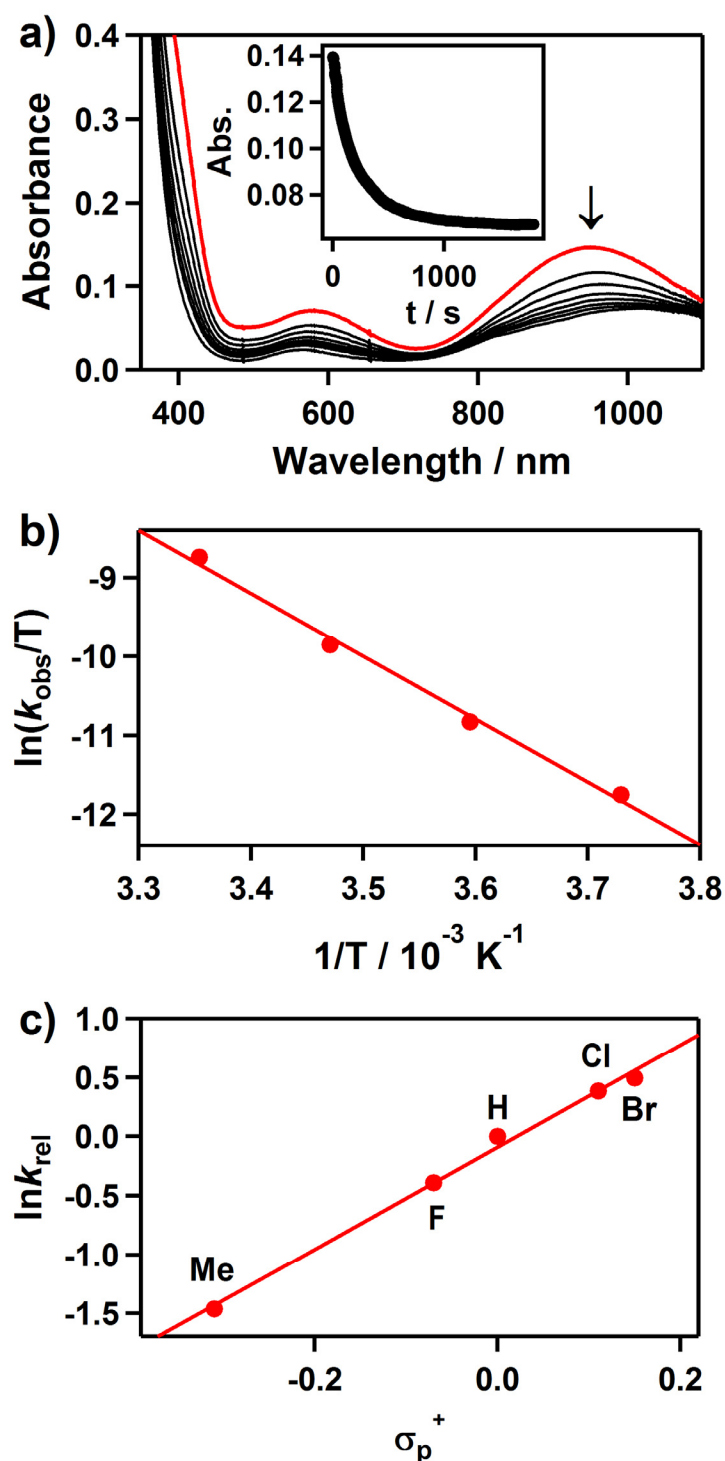

**Figure S7.** Reactions of  $[\text{Ni}^{\text{III}}(\text{CHDAP})(\text{O}_2)]^+$  (**2**) with aldehydes in  $\text{CH}_3\text{CN}:\text{CH}_3\text{OH}$  (1:1). (a) UV-vis spectral changes of **2** (4 mM) upon addition of 100 equiv. of 2-PPA at 25 °C. Inset shows the time course of the absorbance at 934 nm. (b) Plot of first-order rate constants against  $1/T$  to determine activation parameters. (c) Hammett plot of  $\ln k_{\text{rel}}$  against  $\sigma_{\text{p}}^+$  of *para*-substituted benzaldehydes. The  $k_{\text{rel}}$  values were calculated by dividing  $k_{\text{obs}}$  of *para*-X-Ph-CHO (X = Me, F, H, Cl, Br) by  $k_{\text{obs}}$  of benzaldehyde at 25 °C.

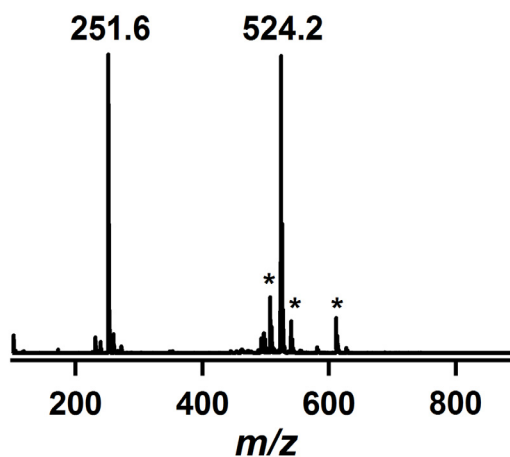

**Figure S8.** ESI-MS taken after the completion of the reaction of **2** with 2-PPA in CH<sub>3</sub>CN at 25 °C, showing the formation of a Ni(II) precursor together with some unidentified species (\*): Mass peaks at *m/z* of 251.6 and 524.2 are assigned to [Ni(CHDAP)(CH<sub>3</sub>CN)]<sup>2+</sup> and [Ni(CHDAP)(NO<sub>3</sub>)]<sup>+</sup>, respectively.

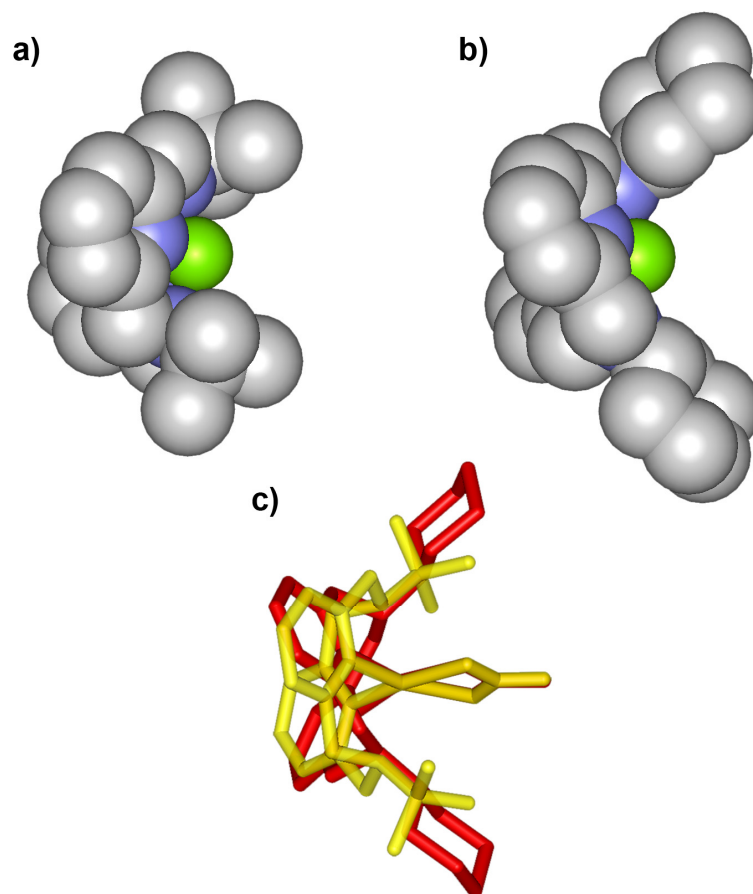

**Figure S9.** Structural comparison of Ni(II) precursor complexes. Space-filling diagrams of  $[\text{Ni}(\text{TBDAP})]^{2+}$  (a) and  $[\text{Ni}(\text{CHDAP})]^{2+}$  (b) moieties taken from the X-ray crystal structures of  $[\text{Ni}(\text{TBDAP})(\text{NO}_3)(\text{H}_2\text{O})]^+$  and  $[\text{Ni}(\text{CHDAP})(\text{NO}_3)]^+$ , respectively, where  $\text{NO}_3^-$  and  $\text{H}_2\text{O}$  molecules are omitted for clarity (C, gray; N, blue; Ni, green). (c) Overlay of the molecular structures of Ni(II) precursors with TBDAP (yellow) and CHDAP (red), illustrating difference in the steric effect on *tert*-butyl vs cyclohexyl groups toward the nickel center. Although the structure of  $[\text{Ni}(\text{TBDAP})(\text{NO}_3)]^+$  is plagued by problems of low-quality crystals, the data were sufficient to show the difference of substituents.

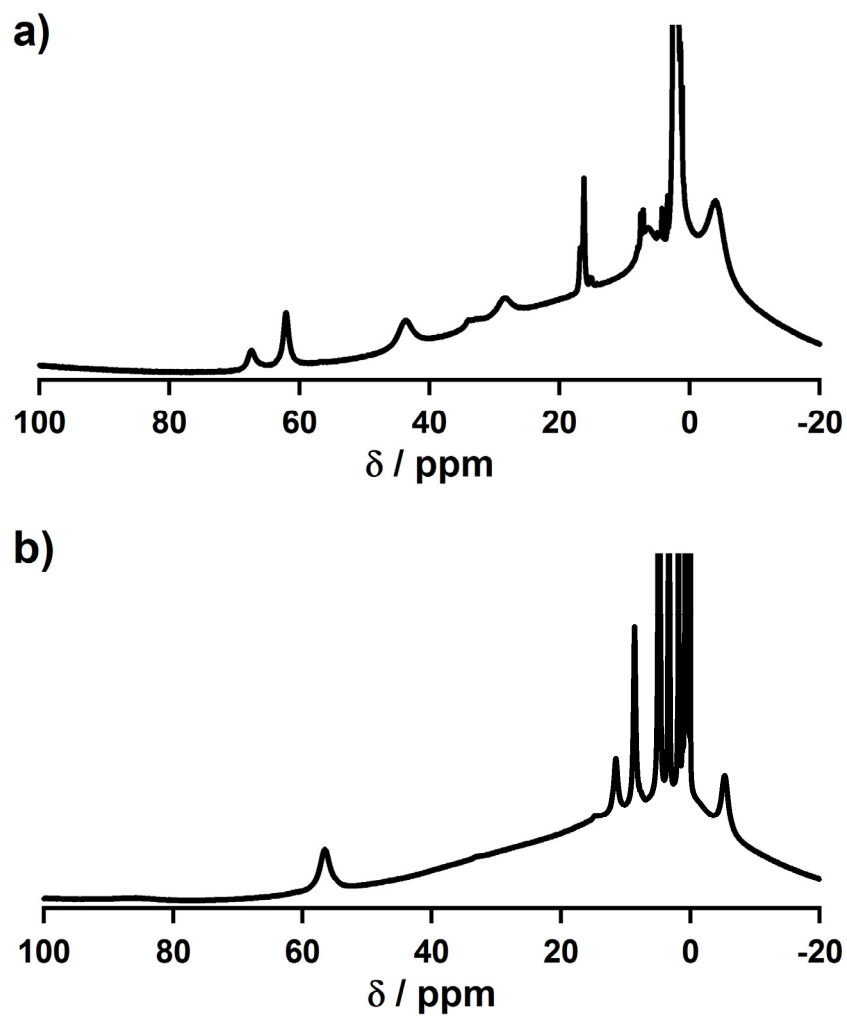

**Figure S10.** The Paramagnetic  $^1\text{H}$  NMR spectra of (a)  $[\text{Ni}(\text{TBDAP})(\text{NO}_3)(\text{H}_2\text{O})]^+$  and (b)  $[\text{Ni}(\text{CHDAP})(\text{NO}_3)]^+$  in  $\text{CD}_3\text{CN}$  at room temperature.
